# Supplementary material for: Manifestation of high-temperature ferromagnetism in fluorinated graphitic carbon nitride nanosheets
Source: Royal Society of Chemistry journal article supplement (doi:10.1039/c5tc02911b), 2015-01-01
Supplement: c5tc02911b1.pdf [file c5tc02911b1.pdf]

## Supporting Information

### Manifestation of High-Temperature Ferromagnetism in Fluorinated Graphitic Carbon Nitride Nanosheets

Daqiang Gao, Yonggang Liu, Minyue Song, Shoupeng Shi, Mingsu Si, Desheng Xue.

Key Laboratory for Magnetism and Magnetic Materials of MOE, Lanzhou University,  
Lanzhou 730000, P. R. China. Tel: +86 0931 8914160;

\*E-mail: sims@lzu.edu.cn, xueds@lzu.edu.cn

**Figure S1:** The N 1s and C 1s XPS spectrum for sample CNF-0.

**Figure S2:** Primitive *M-H* curve for un-fluorinated g-C<sub>3</sub>N<sub>4</sub> nanosheets.

**Figure S3:** The ESR spectrums for the sample CNF-0 and CNF-3.3 %.

**Figure S4:** Primitive *M-H* curves for sample CNF-3.3 % measured at different temperature.

**Table S1.** n<sub>C</sub>/n<sub>N</sub> based on the element analysis of sample CNF-x.

**Table S2.** ICP results for the sample CNF-3.3 %.

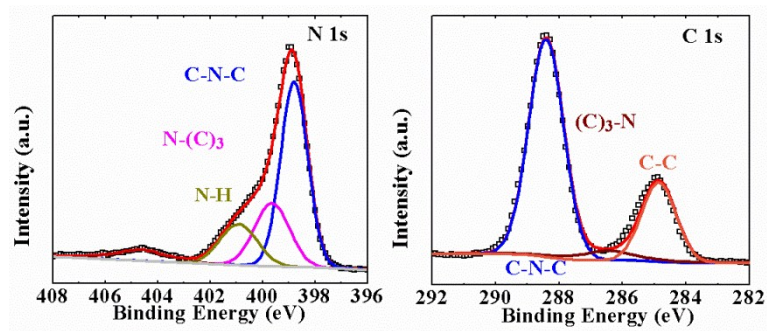

**Figure S1:** The N 1s and C 1s XPS spectrum for sample CNF-0.

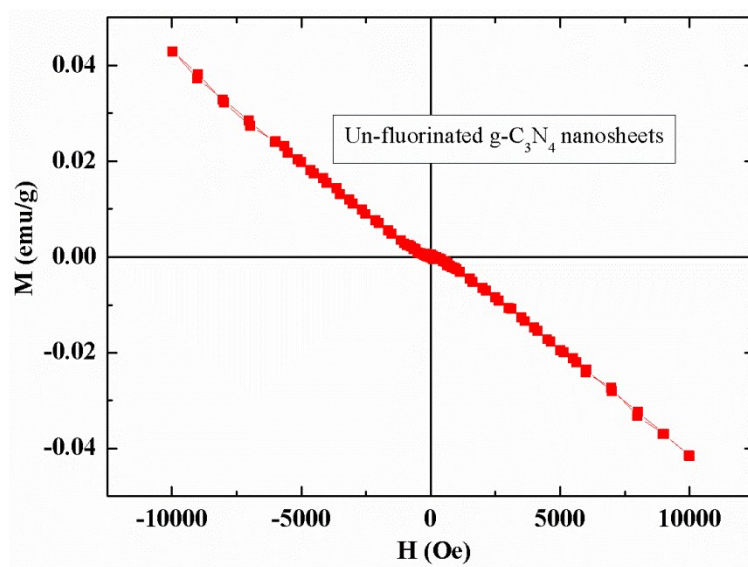

**Figure S2:** Primitive M-H curve for un-fluorinated g-C<sub>3</sub>N<sub>4</sub> nanosheets.

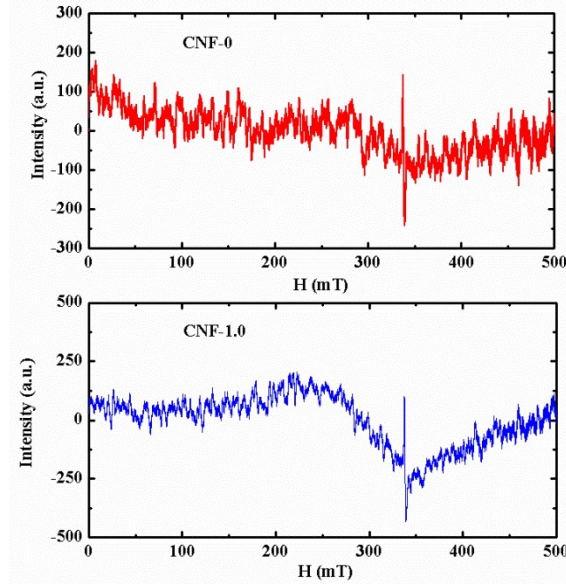

**Figure S3:** The ESR spectrums for the sample CNF-0 and CNF-3.3 %.

ESR results give further evidence for the ferromagnetism of the sample CNF-1.0 as shown in Fig. S5. It can be seen that sample CNF-0 shows the center magnetic fields ( $H_{\text{center}}$ ) at 321 mT, which is corresponding to the paramagnetic resonance. However, for the sample CNF-1.0, besides the paramagnetic resonance, there is a new  $H_{\text{center}}$  at 290 mT appeared, indicating the obvious ferromagnetism of the sample.<sup>1,2</sup>

1. S. Lee, Y. Shon, D. Y. Kim, T. W. Kang, and C. S. Yoon, *Appl. Phys. Lett.* 96, (2010), 042115.

2. D. Q. Gao, G. J. Yang, J. Zhang, Z. H. Zhu, M. S. Si, and D. S. Xue, *Appl. Phys. Lett.* 99, (2011), 052502.

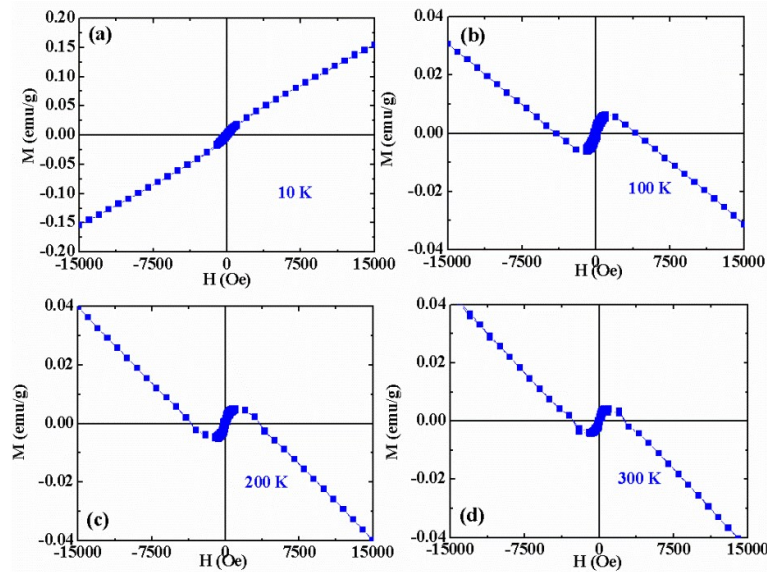

**Figure S4:** Primitive M-H curves for sample CNF-3.3 % measured at different temperature.

**Table S1.**  $n_C/n_N$  based on the element analysis of CNF-x.

| Sample             | CNF-0 | CNF-1.2% | CNF-3.3% | CNF-6.5% |
|--------------------|-------|----------|----------|----------|
| $n_C/n_N$ (First)  | 0.74  | 0.75     | 0.75     | 0.74     |
| $n_C/n_N$ (Second) | 0.74  | 0.74     | 0.75     | 0.75     |

**Table S2.** ICP results for the sample CNF-3.3 %.

| Element content<br>(ppm) | Fe  | Co  | Ni  | Mn  | Cr  |
|--------------------------|-----|-----|-----|-----|-----|
| First                    | 2.8 | 1.8 | 0.1 | 0.0 | 0.5 |
| Second                   | 2.5 | 1.8 | 0.1 | 0.0 | 0.6 |
